# Supplementary material
Source: HighWire-hosted journal article supplement (https://bmjopen.bmj.com/content/14/12/e088343)
Supplement: inline-supplementary-material-1 [file inline-supplementary-material-1.pdf]

# Autism from Menstruation to Menopause Study: My Reproductive Health

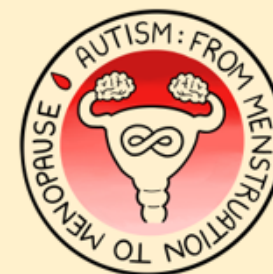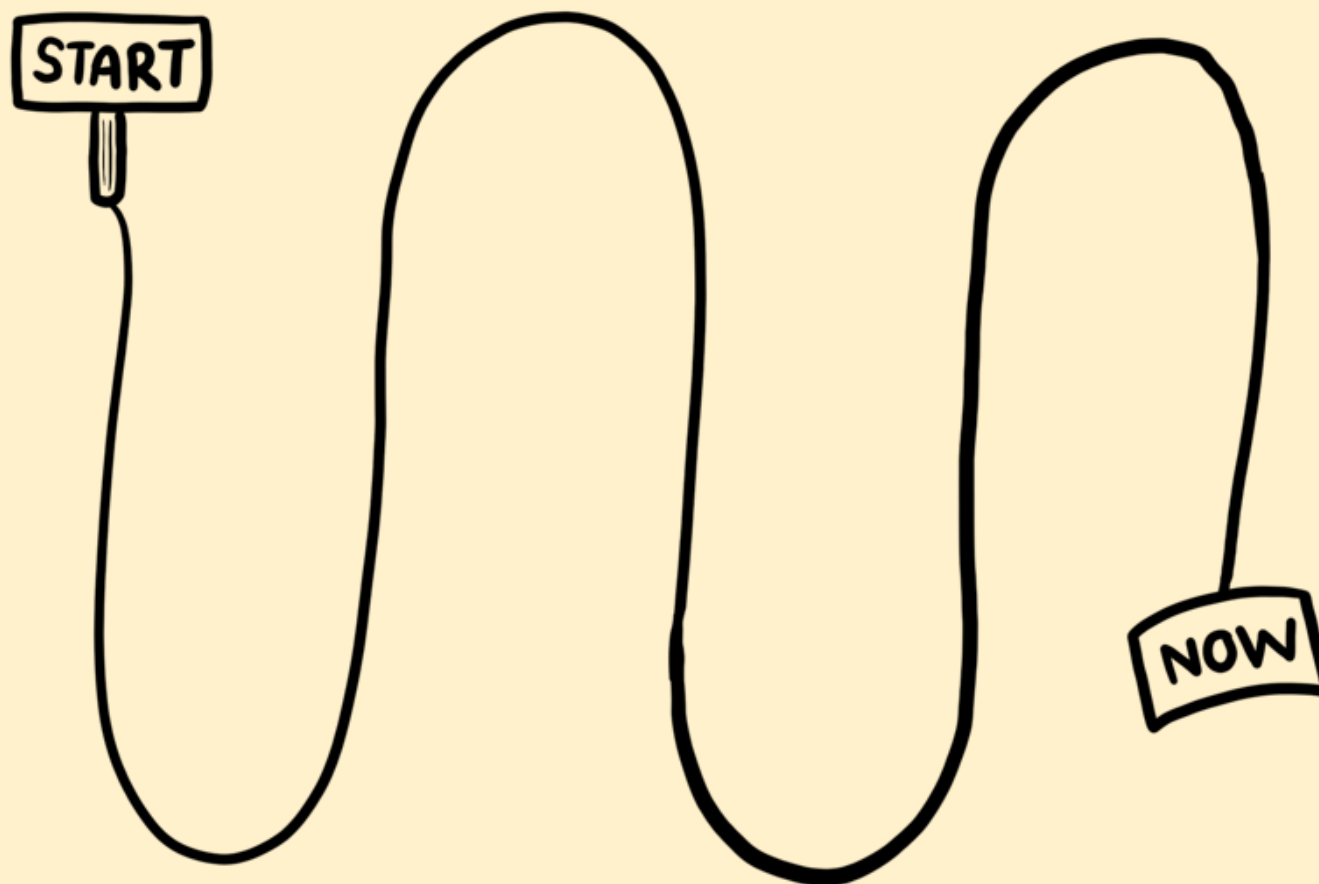

There is no wrong way to use this template.

Put anything you'd like to about your reproductive health on this wavy timeline.

This can be full sentences, keywords, dates, bullet points or doodles.

# Autism from Menstruation to Menopause Study: My Reproductive Health

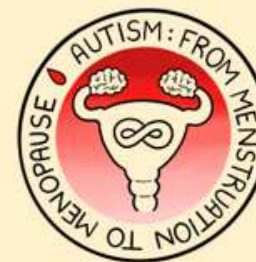

START

NOW

There is no wrong way to use this template.

Put anything you'd like to about your reproductive health on this timeline.

This can be full sentences, dates, bullet points or doodles. Feel free to add boxes or lines.

# Autism from Menstruation to Menopause Study: My Reproductive Health

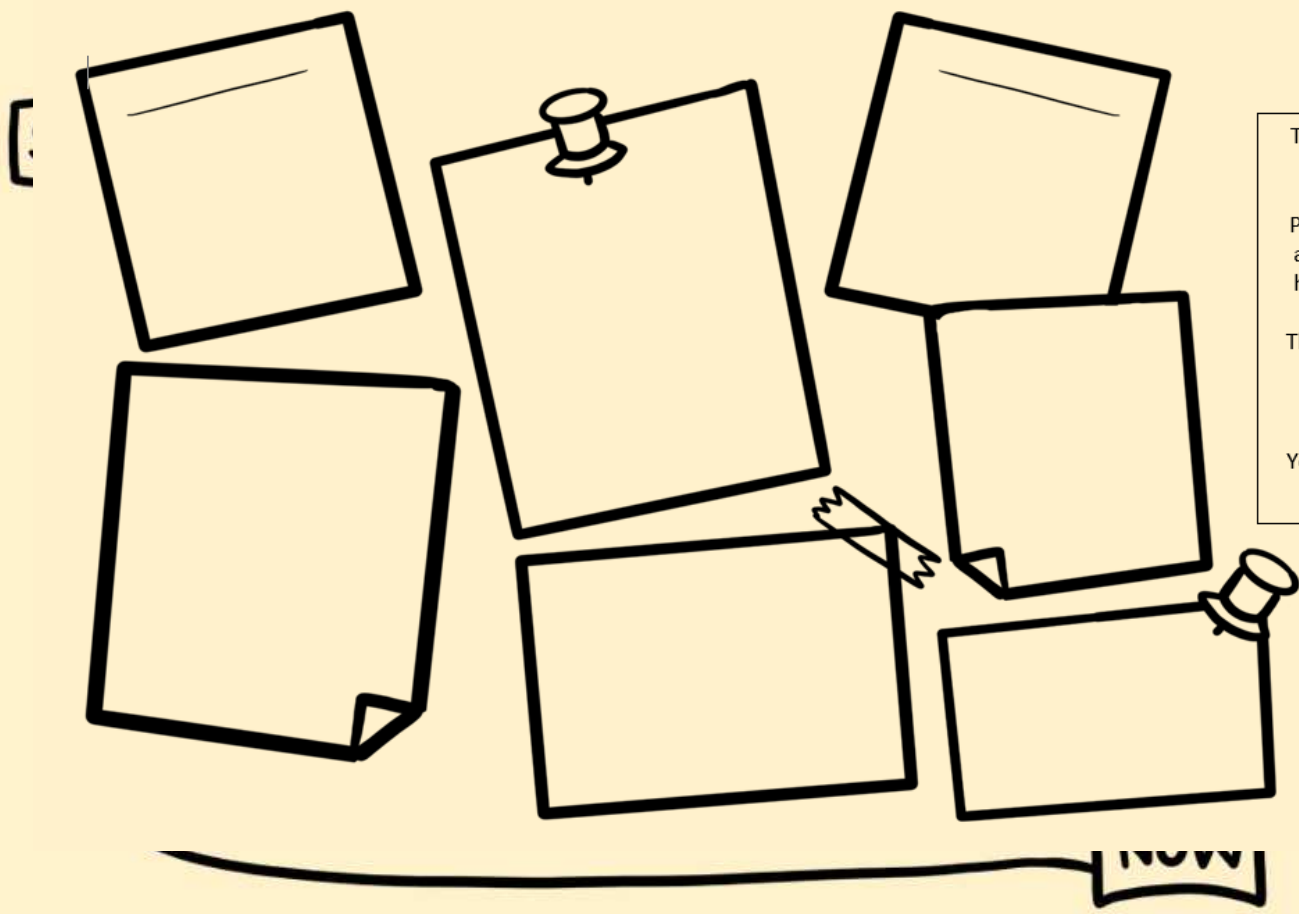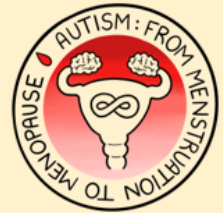

There is no wrong way to use this template.

Put anything you'd like to about your reproductive health in these post-its.

This can be full sentences, keywords, dates, bullet points or doodles.

You do not need to use all these post-its.

way  
ite.  
  
I like  
  
h on  
ne.  
  
l  
rds,  
s or

# Autism from Menstruation to Menopause Study: My Reproductive Health

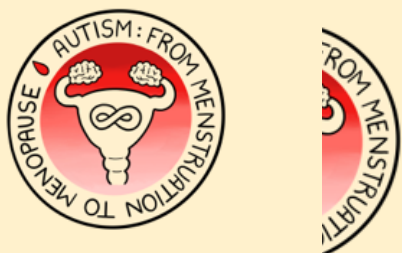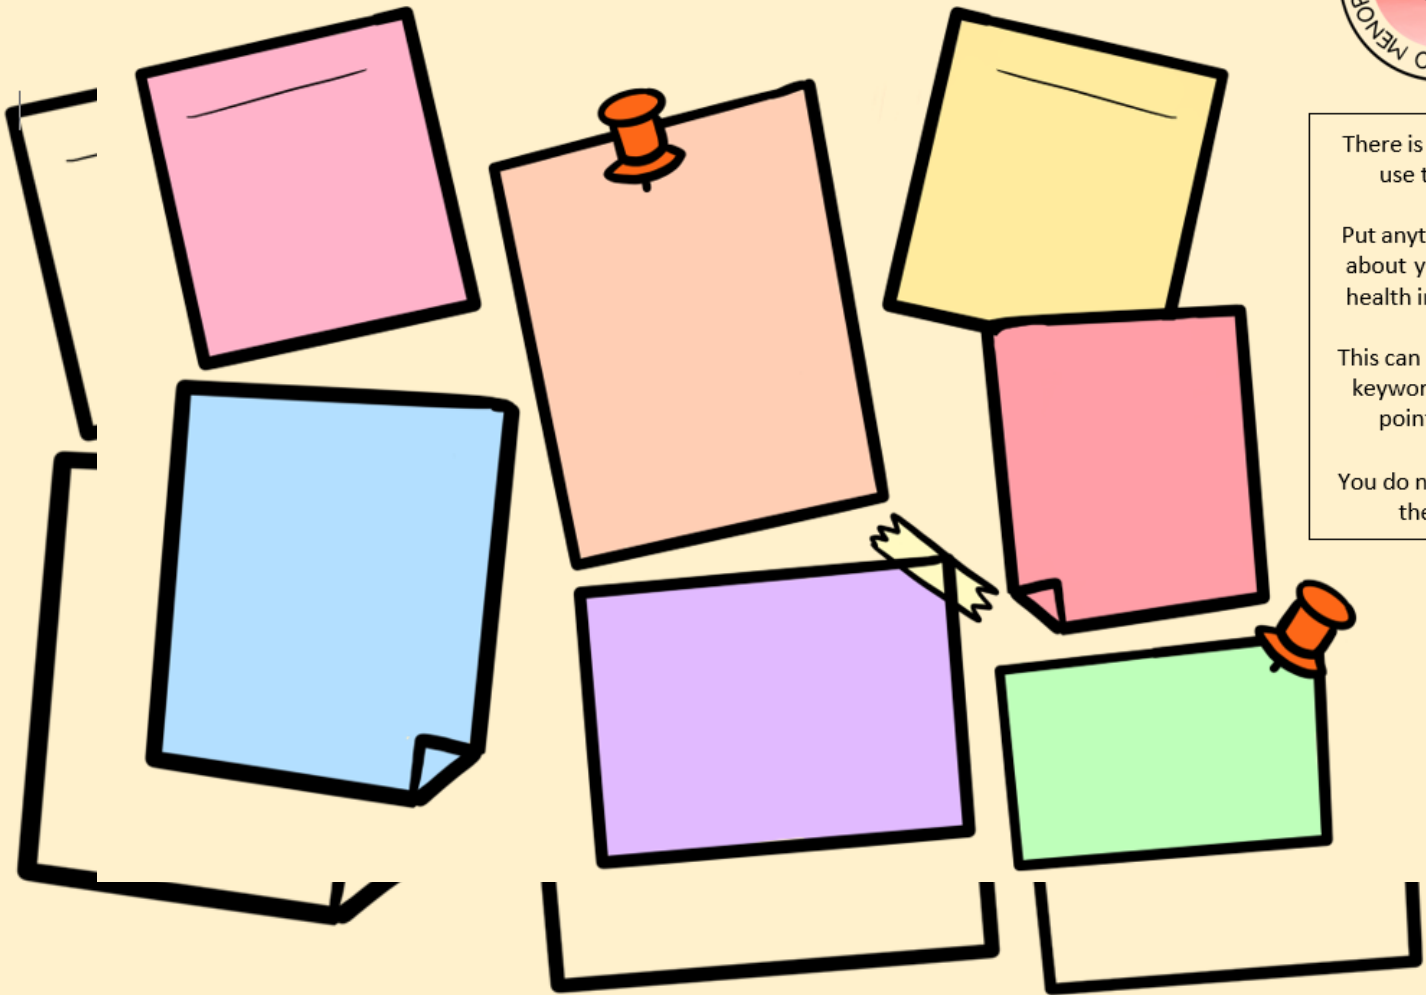

There is no wrong way to use this template.

Put anything you'd like to about your reproductive health in these post-its.

This can be full sentences, keywords, dates, bullet points or doodles.

You do not need to use all these post-its.

way to  
ate.

I like to  
ductive  
st-its.

tences,  
bullet  
les.

use all  
s.

## Autism from Menstruation to Menopause Study: My Reproductive Health

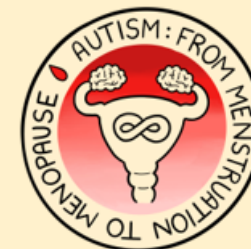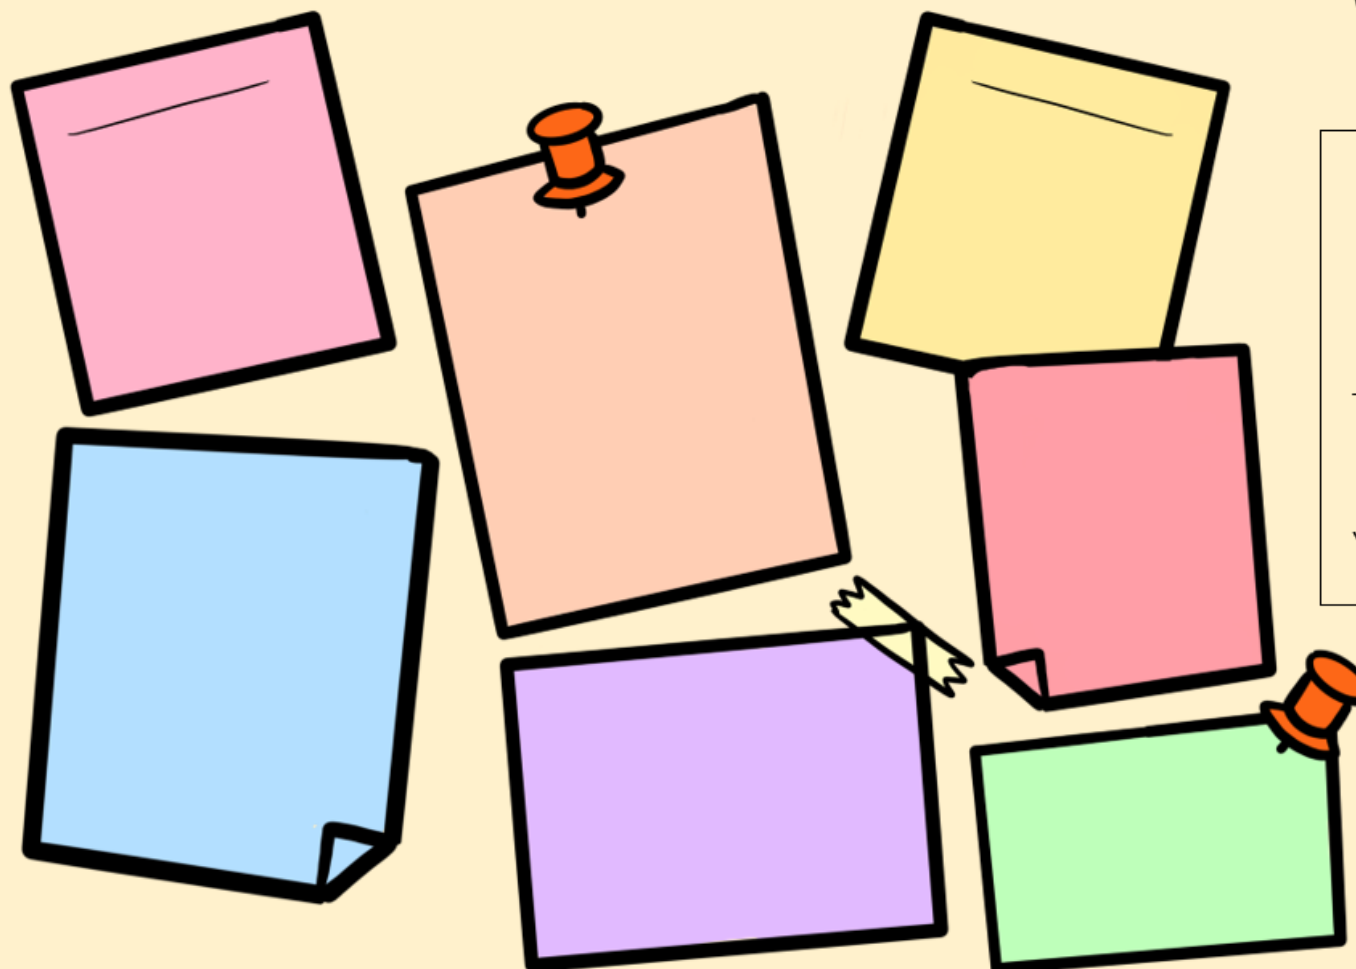

There is no wrong way to use this template.

Put anything you'd like to about your reproductive health in these post-its.

This can be full sentences, keywords, dates, bullet points or doodles.

You do not need to use all these post-its.

## Autism from Menstruation to Menopause Study: My Reproductive Health

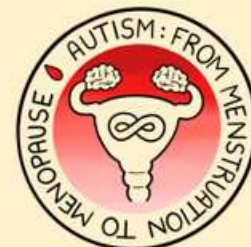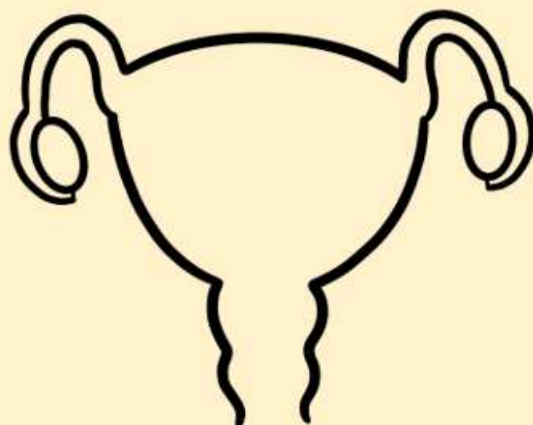

There is no wrong way  
to use this template.

Put anything you'd like  
to about your  
reproductive health  
around the picture.

This can be full  
sentences, keywords,  
dates, bullet points or  
doodles.

Feel free to draw lines or  
boxes.

# Autism from Menstruation to Menopause Study: My Reproductive Health

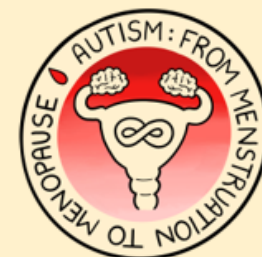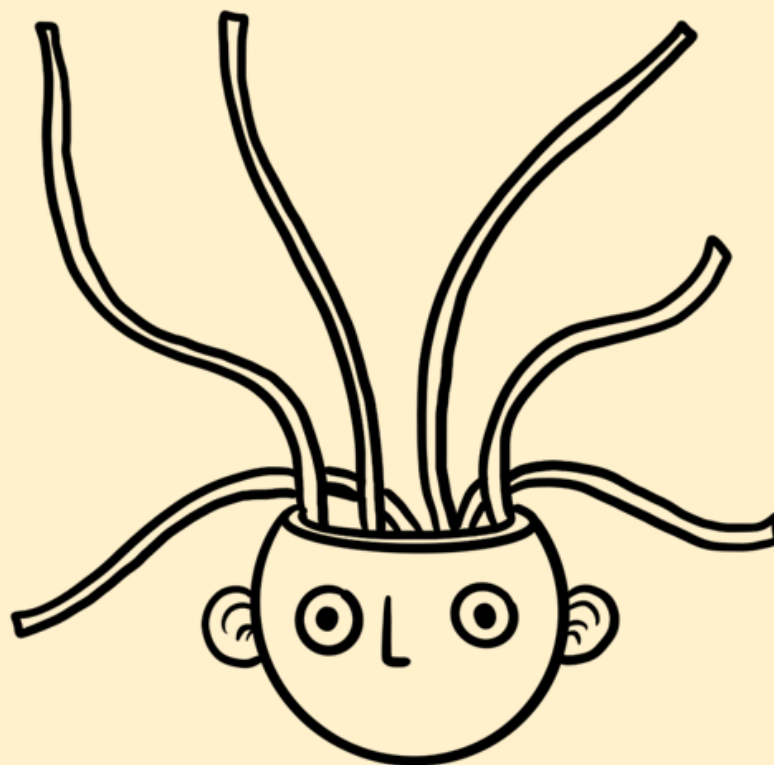

There is no wrong way to use this template.

Put anything you'd like to about your reproductive health around the picture.

This can be full sentences, keywords, dates, bullet points or doodles.

Feel free to draw more lines. You do not have to use them all.

# Autism from Menstruation to Menopause Study: My Reproductive Health

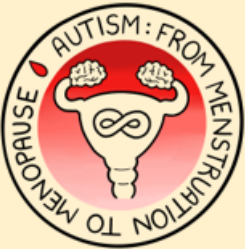

| Time Period:    | Notes: |
|-----------------|--------|
| My First Period |        |
|                 |        |
|                 |        |
|                 |        |
|                 |        |
|                 |        |
|                 |        |
|                 |        |

There is no wrong way to use this template.

Put anything you'd like to about your reproductive health in this table.

There are some example headings – but feel free to put whatever you'd like as titles.

Notes can be full sentences, dates, bullet points or doodles.

They can focus on what you experienced or how you felt.
